# Supplementary material for: Influence of 2-Weeks Mango Ingestion on Inflammation Resolution After Vigorous Exercise
Source: Preprints.org preprint supplement (doi:10.20944/preprints202311.1850.v1), 2023-11-29
Supplement: Supplementary file 1 [file supplementary]

## Sheet: Cover Sheet
		Supplementary Table S1 Plasma Oxylipins.

## Sheet: Oxylipin Data
	WATER						MANGO						WATER						MANGO						WATER						MANGO						WATER						MANGO						WATER
	Pre-Suppl	Post-Suppl	Post-Ex	1.5h Post-Ex	3h Post-Ex	24h Post-Ex	Pre-Suppl	Post-Suppl	Post-Ex	1.5h Post-Ex	3h Post-Ex	24h Post-Ex	Pre-Suppl	Post-Suppl	Post-Ex	1.5h Post-Ex	3h Post-Ex	24h Post-Ex	Pre-Suppl	Post-Suppl	Post-Ex	1.5h Post-Ex	3h Post-Ex	24h Post-Ex	Pre-Suppl	Post-Suppl	Post-Ex	1.5h Post-Ex	3h Post-Ex	24h Post-Ex	Pre-Suppl	Post-Suppl	Post-Ex	1.5h Post-Ex	3h Post-Ex	24h Post-Ex	Pre-Suppl	Post-Suppl	Post-Ex	1.5h Post-Ex	3h Post-Ex	24h Post-Ex	Pre-Suppl	Post-Suppl	Post-Ex	1.5h Post-Ex	3h Post-Ex	24h Post-Ex	Pre-Suppl
IDNM	10-HDoHE	10-HDoHE	10-HDoHE	10-HDoHE	10-HDoHE	10-HDoHE	10-HDoHE	10-HDoHE	10-HDoHE	10-HDoHE	10-HDoHE	10-HDoHE	11,12-diHETrE	11,12-diHETrE	11,12-diHETrE	11,12-diHETrE	11,12-diHETrE	11,12-diHETrE	11,12-diHETrE	11,12-diHETrE	11,12-diHETrE	11,12-diHETrE	11,12-diHETrE	11,12-diHETrE	11-HDoHE	11-HDoHE	11-HDoHE	11-HDoHE	11-HDoHE	11-HDoHE	11-HDoHE	11-HDoHE	11-HDoHE	11-HDoHE	11-HDoHE	11-HDoHE	11-HEPE	11-HEPE	11-HEPE	11-HEPE	11-HEPE	11-HEPE	11-HEPE	11-HEPE	11-HEPE	11-HEPE	11-HEPE	11-HEPE	11-HETE
2	0.187185	0.286885	0.271965	0.29147	0.05414	0	0.231375	0.21311	0.371915	0.2468	0.166245	0.092315	0.17005	0.32837	0.186675	0.34914	0.22568	0.18898	0.26201	0.156275	0.265	0.27418	0.26318	0.159745	0.12768	0.135485	0.19715	0.21994	0.16865	0.015684	0.35178	0.24143	0.5935	0.31864	0.18031	0.12233	0.0828	0.0396825	0.056605	0.035064	0.0367195	0.0431185	0.147745	0.079275	0.13351	0.045707	0.125525	0.071785	0.078495
3	0.154225	0.137985	0.228755	0.119105	0.10094	0.092095	0.11874	0.070805	0.13941	0.208505	0	0.020711	0.166755	0.20664	0.252855	0.158655	0.120375	0.183275	0.181445	0.130705	0.372415	0.62445	0.23407	0.252595	0.181015	0.114845	0.271865	0.45292	0.112135	0.16732	0.058475	0.11597	0.16841	0.17873	0.05742	0.0492725	0.05315	0.125695	0.25612	0.0217295	0.0341535	0.023419	0.075865	0.07832	0.0439335	0.109815	0.018618	0.027343	0.20728
4	0.10784	0.111885	0.0335235	0.06272	0.022701	0.0123345	0.19924	0.17306	0.191645	0.100675	0.15416	0.17051	0.10387	0.17705	0.1979	0.256495	0.2296	0.0460275	0.308715	0.209905	0.494275	0.51485	0.377655	0.095125	0.09826	0.115205	0.10701	0.096615	0.047005	0.0021099	0.052355	0.25339	0.2646	0.211505	0.305815	0.17964	0.091025	0.080775	0.05432	0.030394	0.0199125	0.014056	0.035026	0.0952	0.04153	0.010369	0.05321	0.062775	0.098375
6	0.181315	0.171135	0.52455	0.181325	0.09198	0.071965	0.020927	0.032276	0.154415	0.18573	0.12868	0.134775	0.18152	0.276555	1.28575	0.78785	0.23136	0.318305	0.239805	0.29774	0.5439	0.8494	0.5896	0.275035	0.10589	0.075195	0.5558	0.37657	0.20585	0.1862	0.0492085	0.10145	0.185515	0.082655	0.06624	0.099725	0.11023	0.05696	0.057955	0.052295	0.027354	0.0416045	0.23424	0.1391	0.15916	0.14885	0.0097565	0.06898	0.15771
7	0.093405	0.046321	0.16938	0.108395	0.14324	0.103145	0.051715	0.10747	0.279595	0.242665	0.06617	0.0301415	0.28129	0.323215	0.160665	0.5238	0.21024	0.310685	0.275205	0.149715	0.54915	0.41435	0.50415	0.18754	0.11654	0.174195	0.27153	0.330545	0.37559	0.20458	0.196285	0.297585	0.288865	0.41319	0.280575	0.28896	0.0328025	0.10553	0.0375055	0.150575	0.06645	0.0319925	0.05412	0.0265735	0.079905	0.0387905	0.064605	0.18508	0.11842
8	0.068935	0.097105	0.299145	0.255055	0.180005	0.08521	0.08142	0.14631	0.132645	0.287465	0.21634	0.25978	0.364855	0.315425	0.5581	0.395215	0.329065	0.26333	0.15833	0.30825	0.486705	0.284635	0.302975	0.053395	0.23753	0.17641	0.24109	0.228315	0.22752	0.0288325	0.075255	0.4072	0.26962	0.269715	0.184845	0.095995	0.0654	0.057835	0.11884	0.16033	0.059885	0.099835	0.0307035	0.05743	0.0322405	0.048448	0.033463	0.1131	0.186865
9	0.100175	0.100375	0.277965	0.241385	0.126395	0.186165	0.17626	0.11665	0.26492	0.15044	0.353115	0.067095	0.0469365	0.12546	0.35668	0.461045	0.361195	0.243445	0.30329	0.35557	0.477465	0.244185	0.150505	0.222365	0.076015	0.10916	0.45216	0.240745	0.177105	0.134495	0.103155	0.136625	0.40253	0.287	0.188255	0.16196	0.0483225	0.009489	0.031119	0.09504	0.0363325	0.0865	0.06028	0.0141135	0.039787	0.064275	0.041658	0.102615	0.117305
10	0.10326	0.15071	0.120845	0.0477275	0.06403	0.08227	0.05719	0.05634	0.17578	0.164715	0.12054	0.0399545	0.21027	0.19145	0.495455	0.42336	0.136075	0.151955	0.273855	0.051435	0.73225	0.66305	0.37956	0.320535	0.13093	0.13023	0.12164	0.12632	0.2703	0.05086	0.034523	0.176615	0.53275	0.156895	0.182025	0.07027	0.056825	0.0432385	0.046963	0.0445945	0.055075	0.0446215	0.039061	0.07569	0.205275	0.027193	0.056725	0.0446745	0.145115
11	0.15315	0.06738	0.26425	0.076345	0.157755	0.130275	0.13781	0.100075	0.242315	0.17583	0.23412	0.190595	0.43281	0.172505	0.35725	0.6345	0.40542	0.202545	0.18343	0.276675	0.6383	1.341	0.69875	0.400455	0.072445	0.089015	0.234415	0.130755	0.34073	0.214745	0.108275	0.048152	0.52735	0.426765	0.073995	0.21009	0.033886	0.041839	0.0277085	0.06593	0.0485135	0.0374125	0.06293	0.026793	0.14631	0.0494455	0.119985	0.0429885	0.19936
12	0.10691	0.11224	0.316945	0.171155	0.10253	0.071655	0.141445	0.100695	0.11047	0.07787	0.036915	0.087975	0.46057	0.10859	0.44048	0.5092	0.228725	0.18354	0.29579	0.07517	0.222705	0.355545	0.22313	0.154145	0.111525	0.062805	0.405295	0.174855	0.0573	0.20172	0.079925	0.10672	0.132035	0.06457	0.096555	0.1931	0.050845	0.0399475	0.0338855	0.07839	0.05745	0.046992	0.047731	0.042052	0.033751	0.0329195	0.020535	0.008044	0.14448
13	0.028592	0.07203	0.09857	0.11357	0.08088	0.075475	0.146335	0.06942	0.15814	0.08062	0.08215	0.164655	0.136395	0.212085	0.230765	0.24947	0.100255	0.156615	0.167375	0.15752	0.194265	0.258365	0.19059	0.144075	0.126215	0.1031	0.0302125	0.153225	0.0385585	0.06751	0.05255	0.135255	0.143995	0.071705	0.0370955	0.08854	0.018585	0.023067	0.051875	0.023764	0.0169425	0.0266155	0.0256775	0.0178795	0.069345	0.0298525	0.0292775	0.058175	0.09914
14	0.093545	0.074965	0.243785	0.148185	0.071835	0.0389345	0.102375	0.0411235	0.206395	0.119445	0.07046	0.045522	0.114215	0.199425	0.480255	0.3801	0.28157	0.164405	0.19495	0.112665	0.5548	0.335555	0.244135	0.119605	0.179465	0.121445	0.20243	0.206555	0.04509	0.07356	0.058405	0.0257375	0.195295	0.059055	0.08857	0.077505	0.0072685	0.013497	0.102615	0.05298	0.05294	0.010304	0.05031	0.043888	0.06129	0.082655	0.09398	0.037452	0.207065
15	0.05163	0.13565	0.188555	0.15632	0.12547	0.104565	0.09084	0.095485	0.184165	0.102095	0.05686	0.054495	0.082335	0.09323	0.235345	0.369265	0.14402	0.080925	0.089935	0.112035	0.348935	0.23308	0.097575	0.149725	0.10241	0.09944	0.23143	0.230095	0.136535	0.06976	0.054215	0.07505	0.25592	0.13458	0.0281415	0.072625	0.022671	0.023494	0.074095	0.04678	0.0341775	0.027088	0.026791	0.026642	0.06265	0.0122515	0.028605	0.045703	0.102085
16	0.05604	0.077055	0.16333	0.14746	0.090915	0.11772	0.0466065	0.05574	0.14982	0.104365	0.05137	0.06185	0.20997	0.12431	0.24096	0.23103	0.120055	0.192555	0.15381	0.20658	0.136255	0.162395	0.090155	0.081025	0.10638	0.0380895	0.169075	0.154685	0.103905	0.09398	0.046588	0.051245	0.231265	0.098215	0.050215	0.071985	0.033272	0.02321	0.062505	0.013876	0.0413885	0.0321475	0.045574	0.0227405	0.0486375	0.0278995	0.0223185	0.0323445	0.09019
17	0.119115	0.07361	0.131845	0.095345	0.113405	0.05547	0.05137	0.06185	0.189715	0.075905	0.111205	0.043637	0.140205	0.125765	0.66435	0.52555	0.5067	0.219825	0.090155	0.081025	0.254565	0.17178	0.124305	0.21928	0.09778	0.110975	0.30898	0.201935	0.135845	0.13835	0.050215	0.071985	0.238655	0.09303	0.177835	0.07154	0.023507	0.018525	0.05533	0.049942	0.0942	0.0240685	0.0223185	0.0323445	0.0282665	0.021637	0.039105	0.0213095	0.146915
18	0.0467425	0.109425	0.214975	0.134165	0.046794	0.09156	0.071835	0.09958	0.18105	0.148425	0.06425	0.114575	0.175475	0.13694	0.258585	0.222705	0.138115	0.124835	0.263645	0.182415	0.3059	0.3237	0.21101	0.213325	0.13241	0.12261	0.416505	0.24538	0.197215	0.0460245	0.13639	0.10554	0.217085	0.203855	0.100385	0.0337305	0.0274655	0.05606	0.07349	0.038483	0.0085345	0.0125005	0.0259335	0.0512	0.046087	0.0374435	0.015247	0.0343345	0.172675
19	0.08939	0.088595	0.27727	0.20221	0.13854	0.069315	0.05827	0.05162	0.5139	0.214535	0.36545	0.103025	0.16322	0.102535	0.359755	0.317735	0.084165	0.17651	0.1188	0.118105	0.3546	0.21338	0.23009	0.057785	0.17456	0.10079	0.5326	0.36152	0.25193	0.19209	0.100735	0.07113	0.71615	0.212865	0.450755	0.101985	0.0484165	0.011756	0.0318905	0.035858	0.023492	0.0117215	0.077055	0.024004	0.20996	0.0386205	0.0711	0.0496515	0.213235
20	0.1605	0.123595	0.17129	0.07942	0.03306	0.02256	0.196225	0.064005	0.101155	0.06555	0.050785	0.028126	0.11468	0.22781	0.33656	0.342155	0.11477	0.163205	0.11886	0.24592	0.25802	0.389705	0.228755	0.27015	0.23406	0.082795	0.125505	0.0028423	0.073505	0.0305075	0.14115	0.07026	0.05322	0.0498245	0.083435	0.06134	0.0037423	0.0239625	0.044561	0.011197	0.0217815	0.016885	0.028019	0.015571	0.0340285	0.0235415	0.016441	0.006055	0.120115
21	0.06576	0.050905	0.046425	0.051635	0.039898	0.060655	0.010781	0.05975	0.0382885	0.032364	0.0316055	0.035599	0.190135	0.055265	0.275995	0.1323	0.141705	0.166585	0.17908	0.1914	0.32168	0.26895	0.19941	0.156355	0.063635	0	0	0.0464215	0.11878	0.0260195	0.0193545	0.030032	0.0105095	0.126325	0.045754	0.0063895	0.0097105	0.0037426	0.0129135	0.023207	0.0089095	0.0082725	0.011305	0.024498	0.015912	0.0098335	0.0168035	0.011218	0.0772
22	0.042453	0.053145	0.36878	0.057295	0.06262	0.06765	0.09807	0.0646	0.303775	0.13494	0.04686	0.0463425	0.2034	0.174435	0.721	0.21938	0.301365	0.16512	0.26909	0.131345	0.275335	0.244125	0.1702	0.253365	0.164845	0.06328	0.47894	0.097085	0.13005	0.084355	0.163125	0.11711	0.349995	0.252125	0.102015	0.043611	0.0280105	0.035296	0.114985	0.06162	0.014651	0.0226945	0.008449	0.0157725	0.054365	0.014881	0.034041	0.00352455	0.16158
23	0.048836	0.06737	0.0445915	0.0100375	0.00442765	0.02957	0.0305695	0.085485	0.07928	0.0155545	0.05315	0.07001	0.270805	0.17706	0.63725	0.243705	0.21871	0.22025	0.246235	0.130315	0.572	0.28701	0.225105	0.143315	0.112955	0	0.0257725	0.074295	0.066155	0.05698	0	0.067075	0.11384	0.032523	0.0106455	0.0613	0.010001	0.010593	0.0448175	0.0303665	0.0093165	0.010321	0.026566	0.00641	0.019094	0.0096265	0.0115495	0.013319	0.12043
24	0.0048144	0.014387	0.054085	0.06414	0.021704	0.05299	0.029445	0.0162315	0.041506	0.0423475	0.0413625	0	0.279875	0.0567	0.368305	0.35273	0.181945	0.18637	0.366975	0.179915	0.326165	0.313045	0.23014	0.16178	0.007316	0	0.08383	0.0357735	0	0	0.101095	0	0.182325	0.08636	0.05494	0.00167075	0.015372	0.018573	0.0355325	0.0380835	0.0387115	0.007691	0.041561	0.0140225	0.012998	0.027528	0.0042166	0.030873	0.13115
[truncated: 755 more columns]
